# Supplementary material
Source: PubMed Central journal article supplement (PMC10593113)

# Supplementary Figure 1. Gating strategy for flow cytometry.

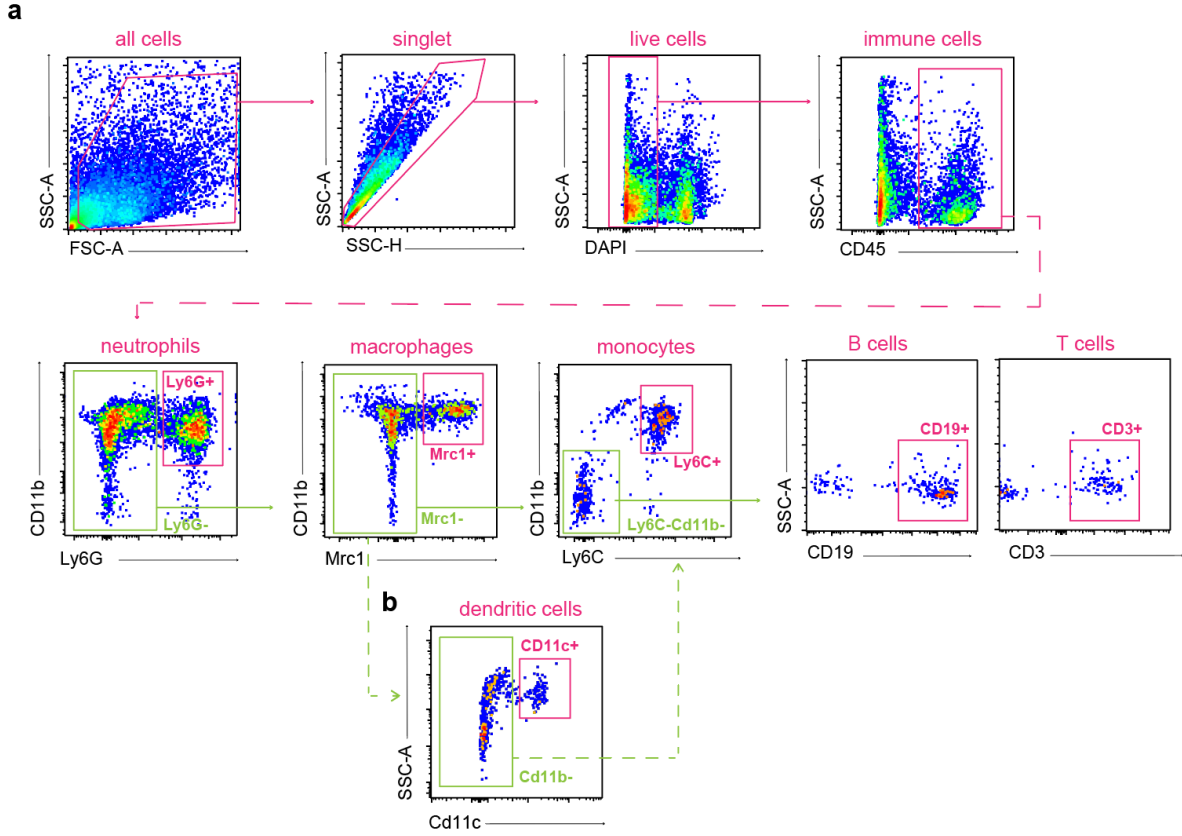

**Supplementary Figure 2. Gating strategy for flow cytometry of blood and spleen.**

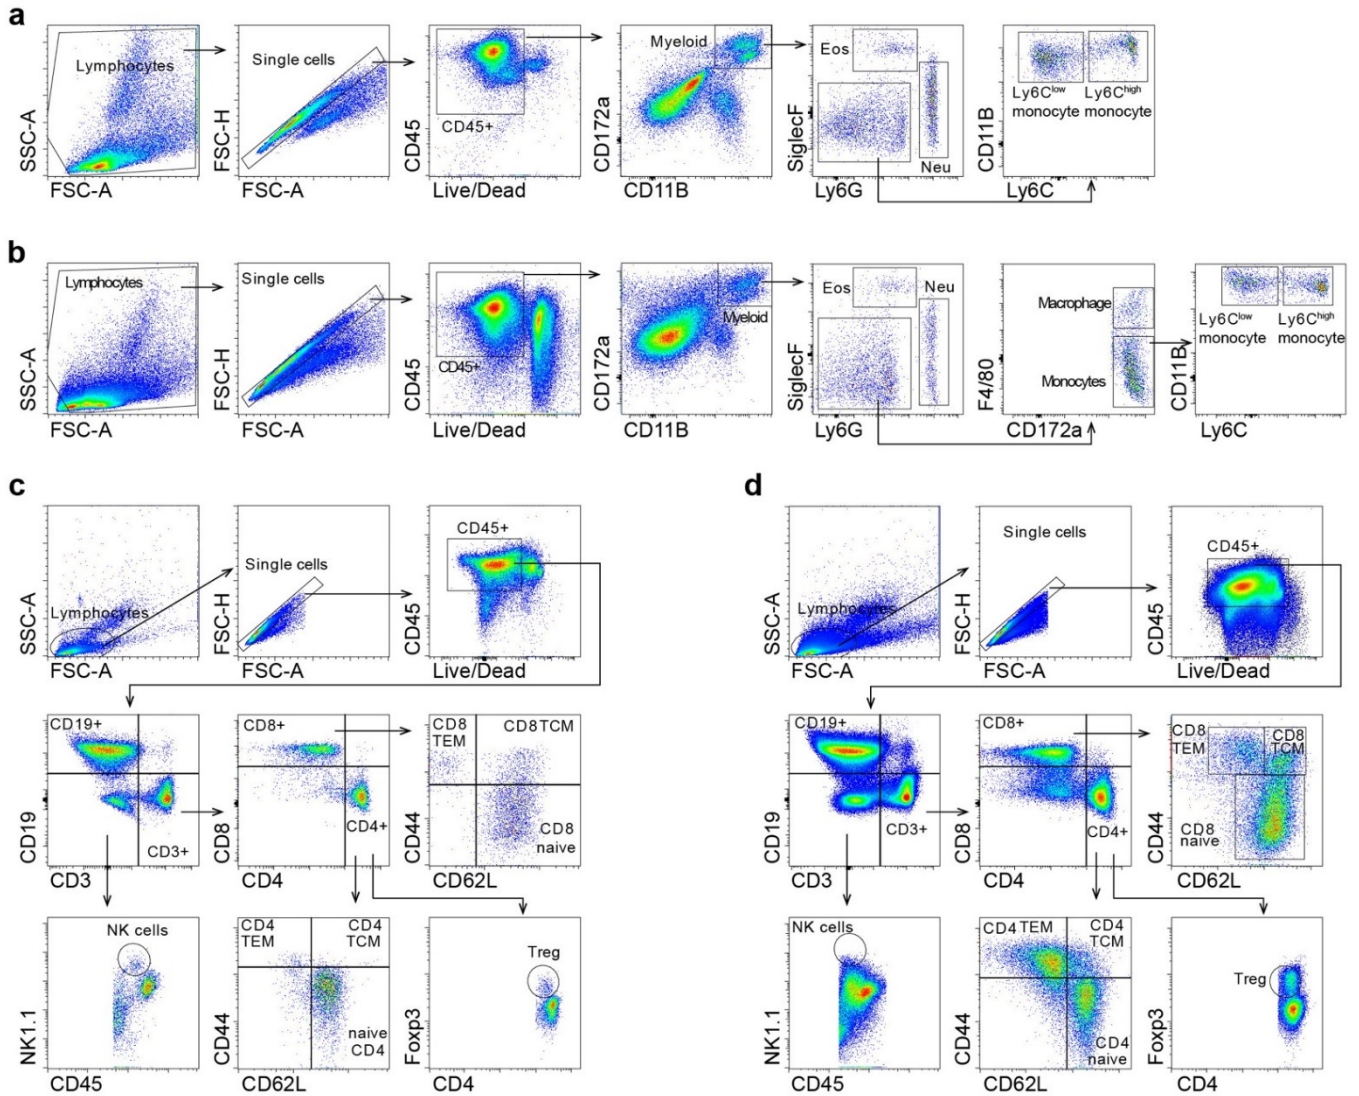

Supplement: NIHMS1926458-supplement-Supp_Figs.pdf [file NIHMS1926458-supplement-Supp_Figs.pdf]
